# Supplementary material for: The Infantile Leukoencephalopathy-Associated Mutation of C11ORF73/HIKESHI Proteins Generates De Novo Interactive Activity with Filamin A, Inhibiting Oligodendroglial Cell Morphological Differentiation
Source: Medicines (Basel). 2021 Feb 1;8(2):9. doi: 10.3390/medicines8020009 (PMC7912763; doi:10.3390/medicines8020009)
Supplement: Supplementary file 1 [file medicines-08-00009-s001.zip]

Archive with 4 entries (4 files):
- Figure S11.pdf
- Figure S12.pdf
- Figure S13.pdf
- medicines-1035191-SUPP final-1-10.pdf
